# Supplementary material for: Synaptic proteasome is inhibited in Alzheimer’s disease models and associates with memory impairment in mice
Source: PubMed Central journal article supplement (PMC10630330; doi:10.1038/s42003-023-05511-9), 2023-11-07
Supplement: 42003_2023_5511_MOESM1_ESM.pdf [file 42003_2023_5511_MOESM1_ESM.pdf]

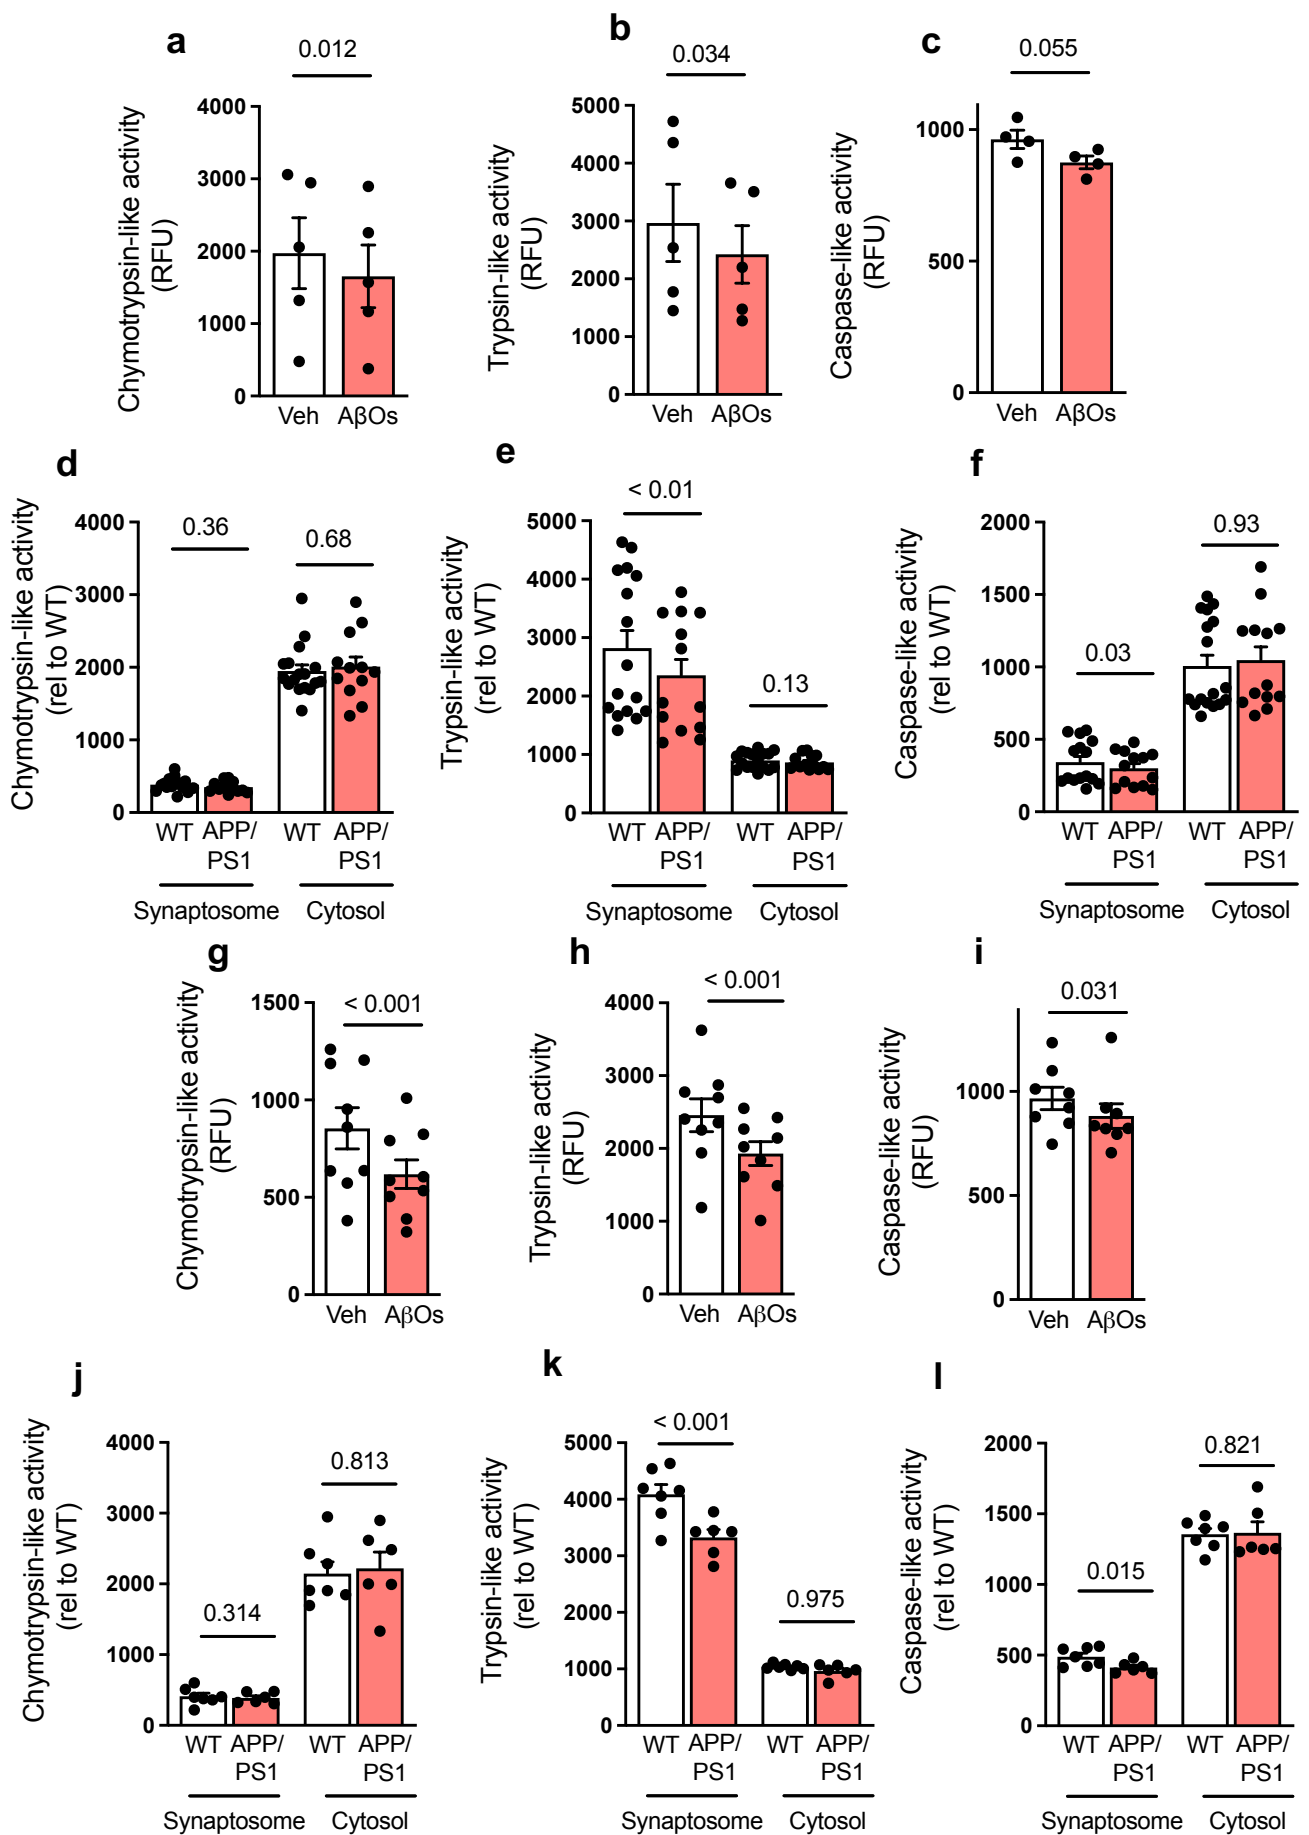

**Supplementary Figure 1. Relative fluorescence units related to main figures in the manuscript . (A-L) Data expressed as relative fluorescence units for Panels 2A-C (A-C), 3A-C (D-F), 3I-K (G-I), 4A-C (J-L).**

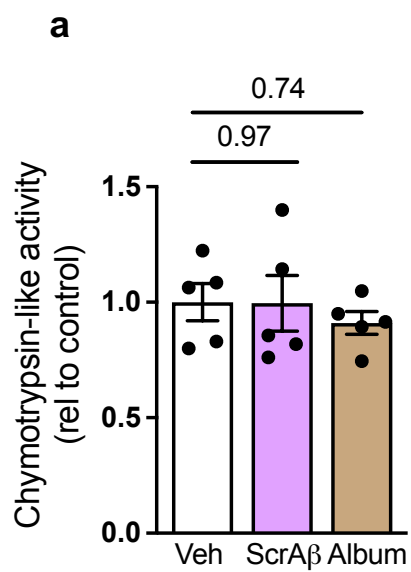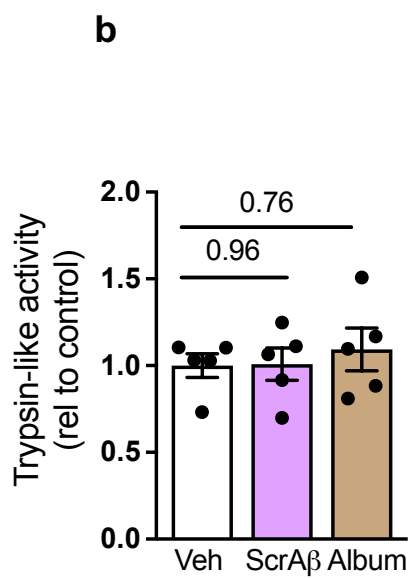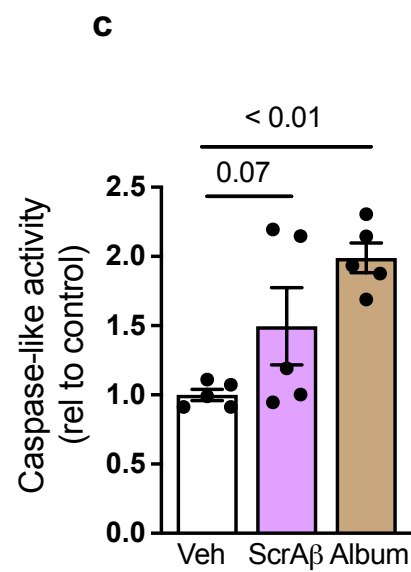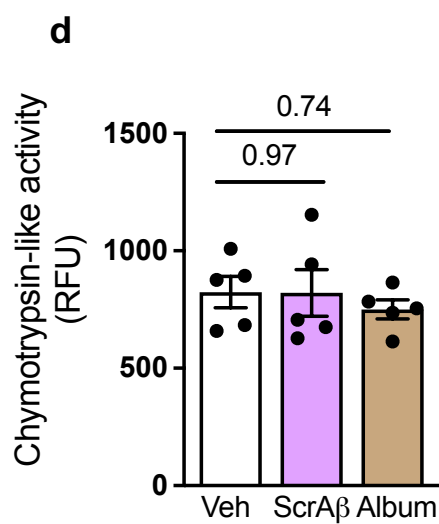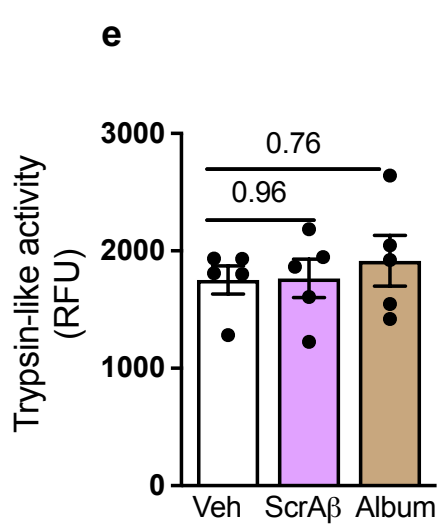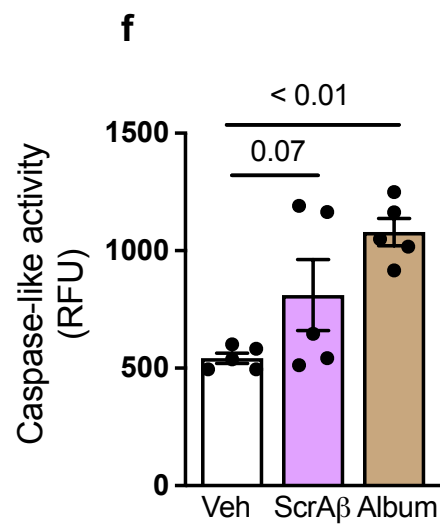

**Supplementary Figure 2. Scrambled A $\beta$  peptide or albumin does not cause proteasome inhibition.** (A-C) Hippocampi from naive mice were harvested and synaptosomes were isolated. Synaptosome preparations were then exposed to Scrambled A $\beta$  (ScrA $\beta$ ), albumin, or vehicle for 1 h at 37 °C, and proteasomal chymotrypsin-, trypsin-, and caspase-like activities were measured and normalized by control. (D-F) Data expressed as relative fluorescence units for graphs A-C (n = 5 synaptosomal preparations from independent mice; Two-tailed One-way Anova with Holm Sidak correction).

Membrane-intact synaptosomes      Supernatant of lysed synaptosomes

Veh      AβOs      Veh      AβOs      Veh      AβOs      Veh      AβOs

250 kDa -

20 kDa -

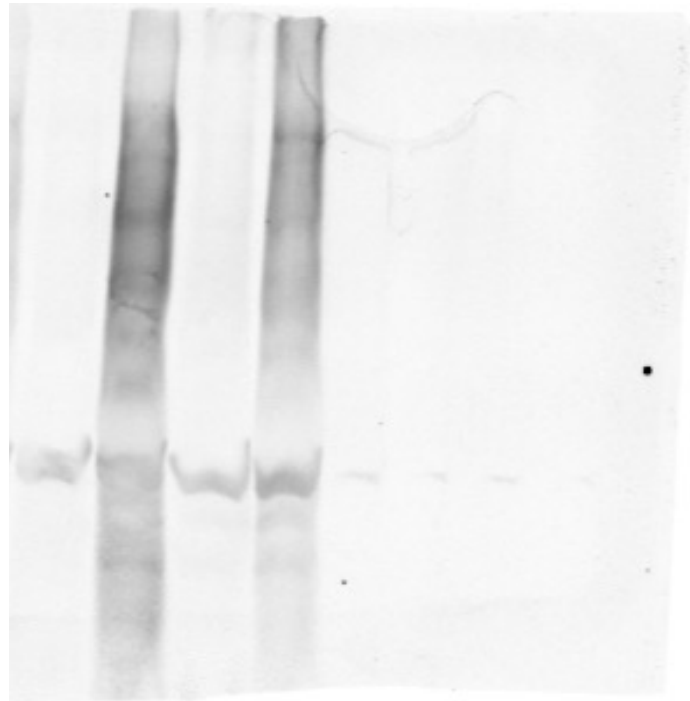

**Supplementary Figure 3. A $\beta$ O<sub>s</sub> were not detected in soluble fractions of synaptosome preparations.** Synthetic A $\beta$ O<sub>s</sub> or vehicle were added to synaptosome preparations for 20 min at 37° C. The synaptosome preparations were either lysed in standard conditions or with a hypotonic buffer and centrifuged to 15 000 g for 10 min at 4°C to remove membrane fraction. We detected A $\beta$ O<sub>s</sub> selectively in total synaptosomes preparations and not in the lysed supernatant, nor in vehicle-treated synaptosomes (n = 2).

**a**

Ubiquitin

GAPDH

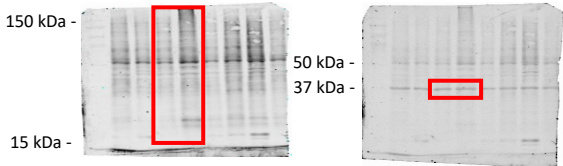**Fig 1a****b**20S  $\alpha$ 1

GAPDH

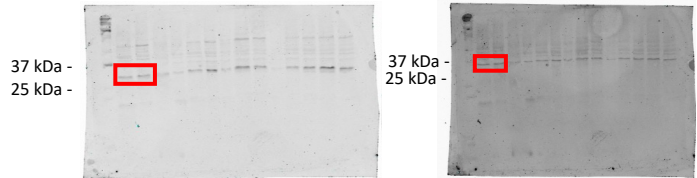**Fig 1b****c**

19S Rpt6

GAPDH

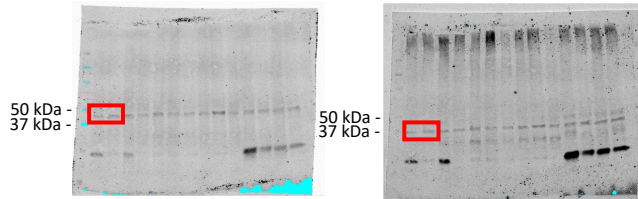**Fig 1c****d**20S  $\alpha$ 1

GAPDH

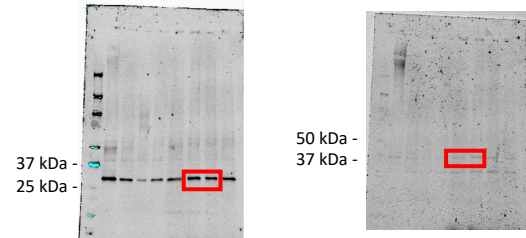**Fig 1g****e**

19S Rpt6

GAPDH

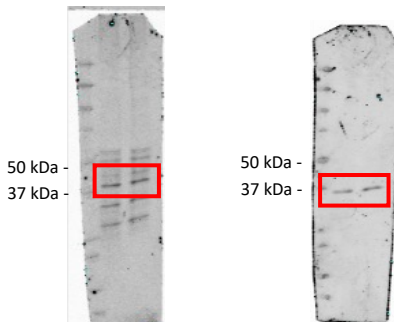**Fig 1h****f**20S  $\alpha$ 1 $\beta$ -actin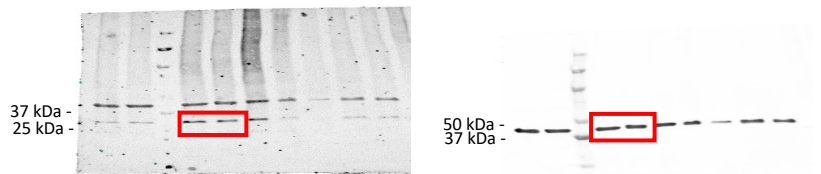**Fig 2d****g**

19S Rpt6

 $\beta$ -actin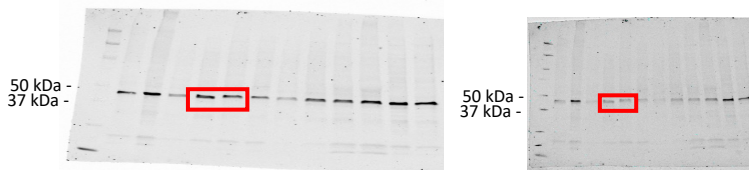**Fig 2e**

**Supplementary Figure 4. Full blots relative to panels presented in Figures 1 and 2.**



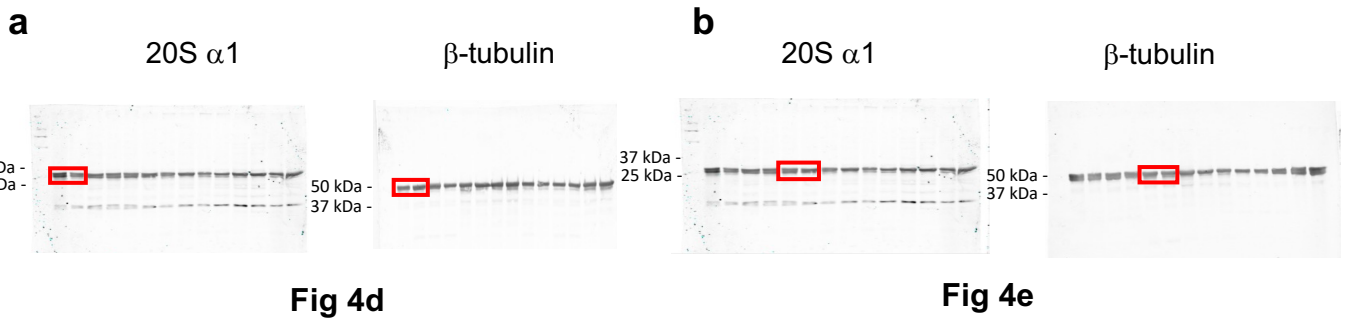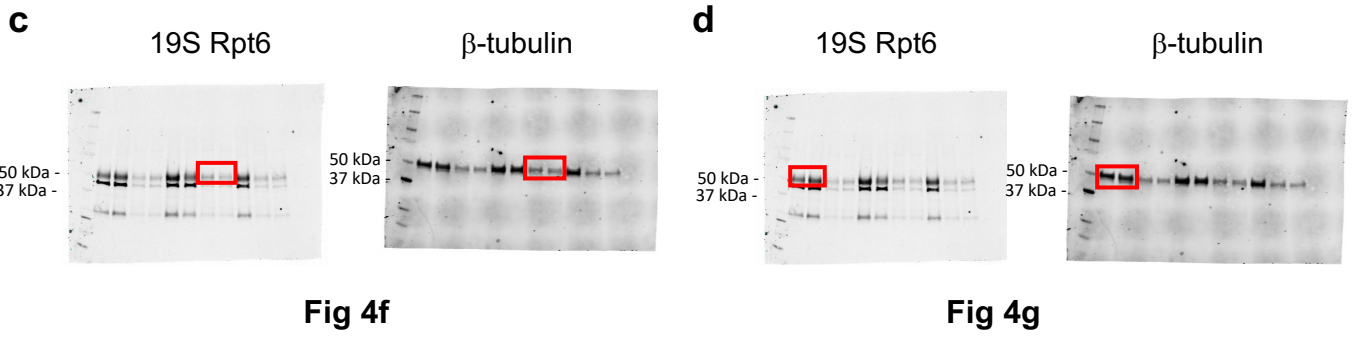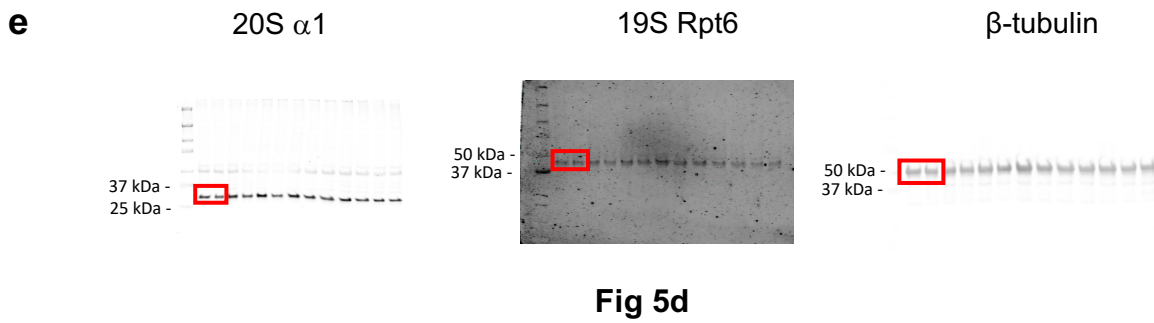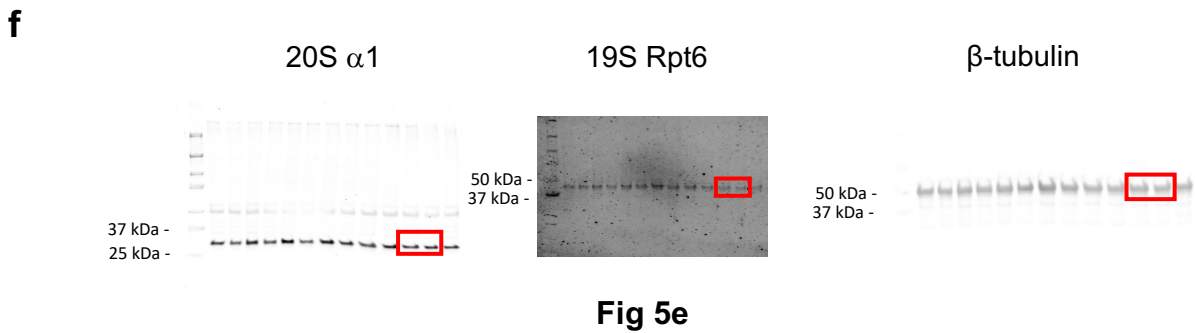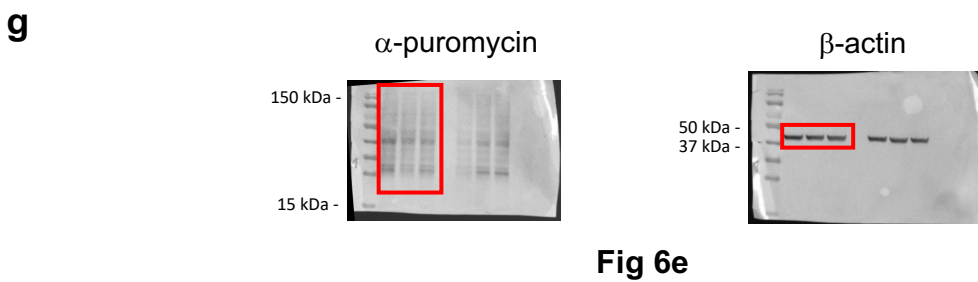

**Supplementary Figure 5. Full blots relative to panels presented in Figures 4, 5 and 6.**
